# Supplementary material for: A Novel Prebiotic Blend Product Prevents Irritable Bowel Syndrome in Mice by Improving Gut Microbiota and Modulating Immune Response
Source: MDPI journal article supplement (doi:10.3390/nu9121341), 2017-12-09

Figure S1

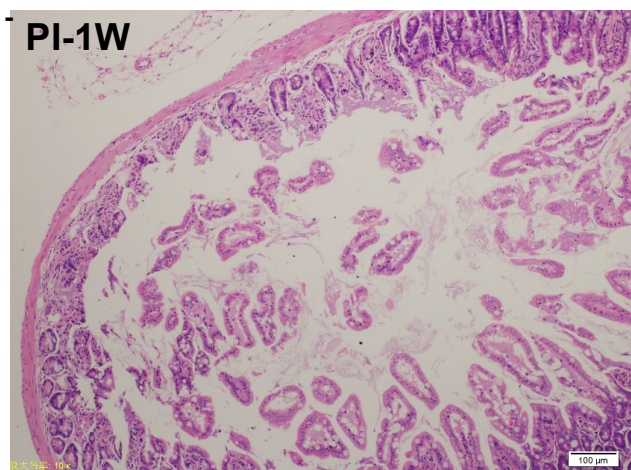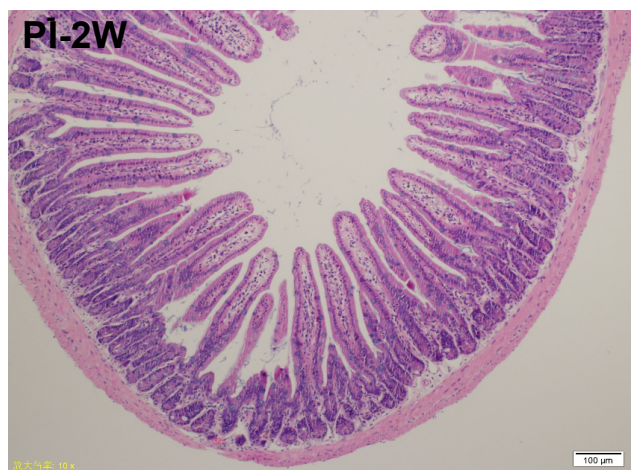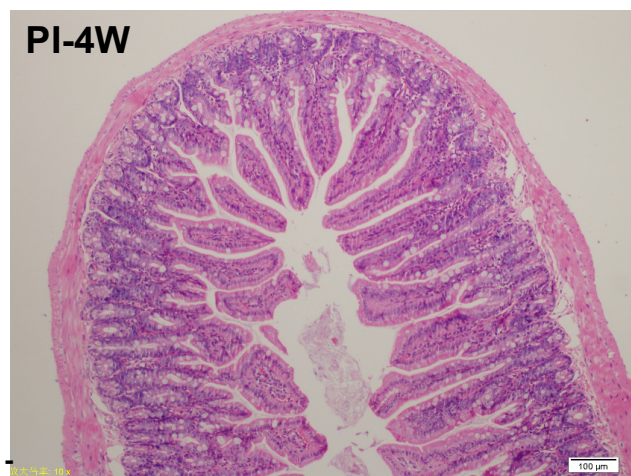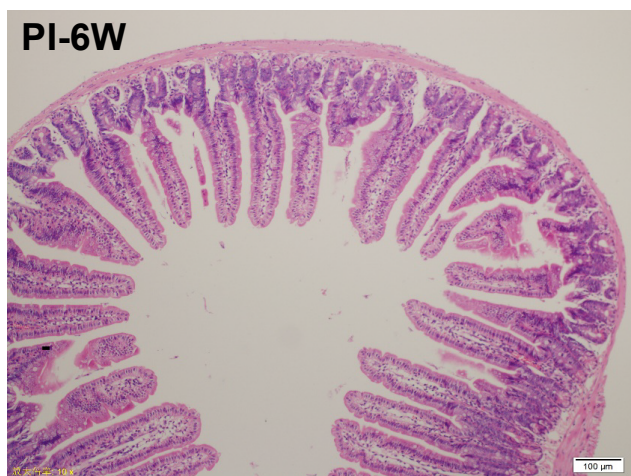

Figure S2

A

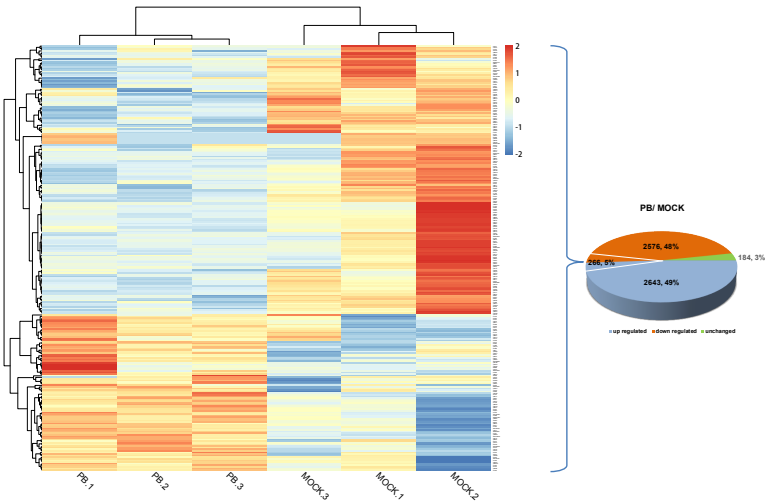

B

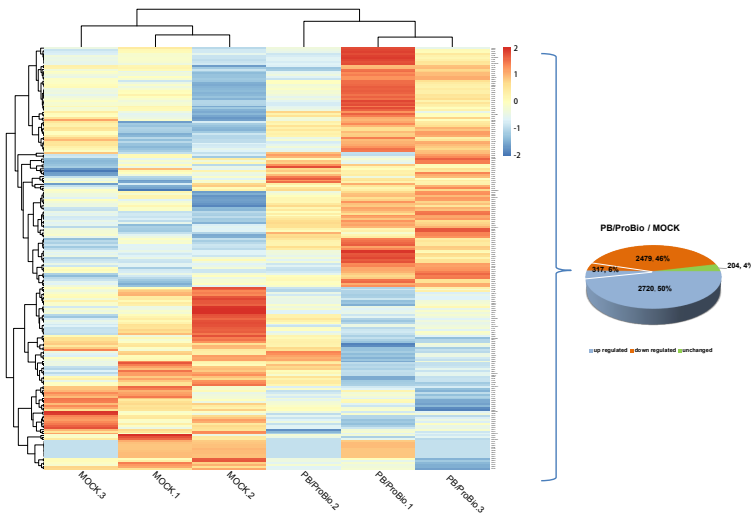

C

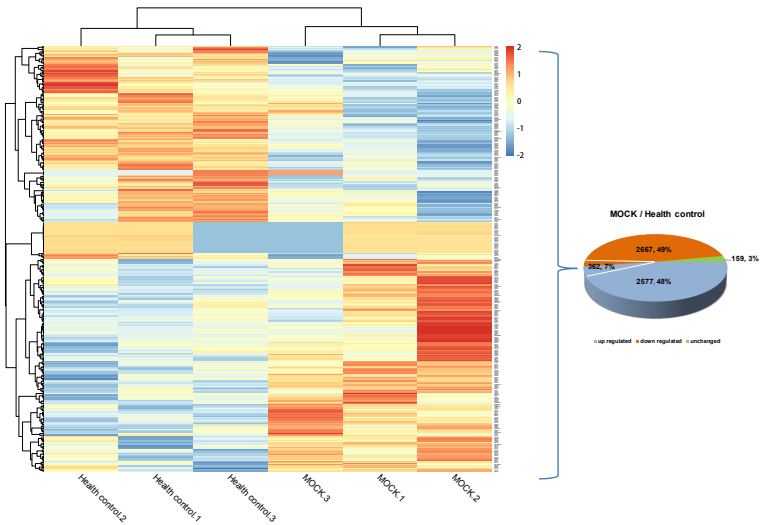

Supplement: s1 [file s1]
